# Supplementary material for: Relativistic effects on the aromaticity of E3M3H3 (E = C–Pb; M = N–Bi) benzene analogues
Source: Royal Society of Chemistry journal article supplement (doi:10.1039/d0cp04446f), 2020-01-01
Supplement: d0cp04446f1.pdf [file d0cp04446f1.pdf]

## ELECTRONIC SUPPLEMENTARY INFORMATION

### Relativistic effects on the Aromaticity of $E_3M_3H_3$ ( $E = C - Pb$ ; $M = N - Bi$ ) Benzene

#### Analogues

Ricardo Pino-Rios<sup>a</sup>, Alejandro Vásquez-Espinal<sup>b</sup>, Luis Alvarez-Thon<sup>c,\*</sup> and William  
Tiznado<sup>b,\*</sup>

<sup>a</sup>Laboratorio de Química Teórica, Facultad de Química y Biología, Universidad de Santiago de Chile (USACH), Av. Libertador Bernardo O'Higgins 3363, Santiago, Estación Central, Región Metropolitana, Chile.

<sup>b</sup>Departamento de Química, Facultad de Ciencias Exactas, Computational and Theoretical Chemistry Group, Universidad Andres Bello (UNAB), Av. República 275, Santiago, Región Metropolitana, Chile

<sup>c</sup>Facultad de Ingeniería, Universidad Central de Chile, Toesca, Santiago, 1783, Chile

**Table S1.** E-M bond lengths (in Å) obtained at the non-relativistic (NR), scalar (SR) and spin-orbit (SO) relativistic (ZORA)/BP86/TZ2P level.

| System                                         | E-M  |      |      | E-H  |      |      |
|------------------------------------------------|------|------|------|------|------|------|
|                                                | NR   | SR   | SO   | NR   | SR   | SO   |
| C <sub>6</sub> H <sub>6</sub>                  | 1.41 | 1.41 | 1.40 | 1.08 | 1.08 | 1.09 |
| C <sub>3</sub> N <sub>3</sub> H <sub>3</sub>   | 1.34 | 1.34 | 1.34 | 1.12 | 1.12 | 1.09 |
| C <sub>3</sub> P <sub>3</sub> H <sub>3</sub>   | 1.72 | 1.72 | 1.74 | 1.13 | 1.13 | 1.10 |
| C <sub>3</sub> As <sub>3</sub> H <sub>3</sub>  | 1.86 | 1.86 | 1.86 | 1.10 | 1.10 | 1.10 |
| C <sub>3</sub> Sb <sub>3</sub> H <sub>3</sub>  | 2.06 | 2.06 | 2.06 | 1.10 | 1.10 | 1.10 |
| C <sub>3</sub> Bi <sub>3</sub> H <sub>3</sub>  | 2.14 | 2.15 | 2.15 | 1.09 | 1.10 | 1.10 |
| Si <sub>3</sub> N <sub>3</sub> H <sub>3</sub>  | 1.70 | 1.70 | 1.66 | 1.51 | 1.50 | 1.48 |
| Si <sub>3</sub> P <sub>3</sub> H <sub>3</sub>  | 2.15 | 2.15 | 2.15 | 1.49 | 1.49 | 1.49 |
| Si <sub>3</sub> As <sub>3</sub> H <sub>3</sub> | 2.26 | 2.26 | 2.26 | 1.50 | 1.50 | 1.50 |
| Si <sub>3</sub> Sb <sub>3</sub> H <sub>3</sub> | 2.48 | 2.48 | 2.48 | 1.50 | 1.50 | 1.50 |
| Si <sub>3</sub> Bi <sub>3</sub> H <sub>3</sub> | 2.55 | 2.56 | 2.57 | 1.50 | 1.51 | 1.51 |
| Ge <sub>3</sub> N <sub>3</sub> H <sub>3</sub>  | 1.79 | 1.79 | 1.79 | 1.54 | 1.53 | 1.53 |
| Ge <sub>3</sub> P <sub>3</sub> H <sub>3</sub>  | 2.23 | 2.22 | 2.22 | 1.55 | 1.55 | 1.55 |
| Ge <sub>3</sub> As <sub>3</sub> H <sub>3</sub> | 2.33 | 2.33 | 2.33 | 1.56 | 1.55 | 1.55 |
| Ge <sub>3</sub> Sb <sub>3</sub> H <sub>3</sub> | 2.54 | 2.53 | 2.53 | 1.56 | 1.56 | 1.56 |
| Ge <sub>3</sub> Bi <sub>3</sub> H <sub>3</sub> | 2.60 | 2.61 | 2.63 | 1.56 | 1.56 | 1.57 |
| Sn <sub>3</sub> N <sub>3</sub> H <sub>3</sub>  | 2.01 | 2.01 | 2.01 | 1.74 | 1.72 | 1.72 |
| Sn <sub>3</sub> P <sub>3</sub> H <sub>3</sub>  | 2.43 | 2.42 | 2.42 | 1.74 | 1.74 | 1.73 |
| Sn <sub>3</sub> As <sub>3</sub> H <sub>3</sub> | 2.53 | 2.52 | 2.52 | 1.75 | 1.74 | 1.74 |
| Sn <sub>3</sub> Sb <sub>3</sub> H <sub>3</sub> | 2.72 | 2.71 | 2.72 | 1.75 | 1.74 | 1.74 |
| Sn <sub>3</sub> Bi <sub>3</sub> H <sub>3</sub> | 2.78 | 2.79 | 2.83 | 1.75 | 1.75 | 1.76 |
| Pb <sub>3</sub> N <sub>3</sub> H <sub>3</sub>  | 2.09 | 2.11 | 2.11 | 1.78 | 1.79 | 1.78 |
| Pb <sub>3</sub> P <sub>3</sub> H <sub>3</sub>  | 2.50 | 2.50 | 2.50 | 1.78 | 1.81 | 1.80 |
| Pb <sub>3</sub> As <sub>3</sub> H <sub>3</sub> | 2.59 | 2.60 | 2.59 | 1.78 | 1.81 | 1.80 |
| Pb <sub>3</sub> Sb <sub>3</sub> H <sub>3</sub> | 2.77 | 2.79 | 2.79 | 1.78 | 1.82 | 1.81 |
| Pb <sub>3</sub> Bi <sub>3</sub> H <sub>3</sub> | 2.83 | 2.87 | 2.92 | 1.78 | 1.82 | 1.83 |

**Table S2.** Ionization potential (IP), electron affinity (EA) and Mulliken electronegativity ( $\chi$ ) values (in eV) at the non-relativistic (NR), scalar (SR) and spin-orbit (SO) relativistic (ZORA)/BP86/TZ2P level.

| Atom | NR   |     |        | SR   |     |        | SO   |     |        |
|------|------|-----|--------|------|-----|--------|------|-----|--------|
|      | IP   | EA  | $\chi$ | IP   | EA  | $\chi$ | IP   | EA  | $\chi$ |
| C    | 11.0 | 0.9 | 5.9    | 11.0 | 0.9 | 5.9    | 11.0 | 0.9 | 5.9    |
| Si   | 7.9  | 1.1 | 4.5    | 7.8  | 1.1 | 4.5    | 7.9  | 1.1 | 4.5    |
| Ge   | 7.6  | 1.1 | 4.4    | 7.6  | 1.1 | 4.3    | 7.7  | 1.0 | 4.3    |
| Sn   | 7.1  | 1.2 | 4.2    | 7.0  | 1.1 | 4.1    | 7.3  | 0.9 | 4.1    |
| Pb   | 6.9  | 1.2 | 4.1    | 6.7  | 1.1 | 3.9    | 7.5  | 0.4 | 3.9    |
| N    | 13.7 | 1.7 | 7.7    | 13.7 | 1.7 | 7.7    | 13.7 | 1.7 | 7.7    |
| P    | 9.8  | 2.0 | 5.9    | 9.8  | 2.0 | 5.9    | 9.8  | 2.0 | 5.9    |
| As   | 9.3  | 1.9 | 5.6    | 9.3  | 1.9 | 5.6    | 9.1  | 1.8 | 5.4    |
| Sb   | 8.5  | 2.0 | 5.2    | 8.5  | 1.9 | 5.2    | 8.1  | 1.6 | 4.9    |
| Bi   | 8.2  | 2.0 | 5.1    | 8.1  | 1.8 | 4.9    | 7.1  | 1.1 | 4.1    |

**Table S3** NICS(1)<sub>zz</sub> values obtained at the non-relativistic (NR), scalar (SR) and spin-orbit (SO) relativistic (ZORA)/BP86/TZ2P level.

| System                                         | NICS(1) <sub>zz</sub> (ppm) |        |        |
|------------------------------------------------|-----------------------------|--------|--------|
|                                                | NR                          | SR     | SO     |
| C <sub>6</sub> H <sub>6</sub>                  | -28.15                      | -28.17 | -28.55 |
| C <sub>3</sub> N <sub>3</sub> H <sub>3</sub>   | -25.02                      | -25.02 | -24.86 |
| C <sub>3</sub> P <sub>3</sub> H <sub>3</sub>   | -21.89                      | -21.88 | -21.94 |
| C <sub>3</sub> As <sub>3</sub> H <sub>3</sub>  | -20.12                      | -20.26 | -20.24 |
| C <sub>3</sub> Sb <sub>3</sub> H <sub>3</sub>  | -15.08                      | -15.47 | -15.05 |
| C <sub>3</sub> Bi <sub>3</sub> H <sub>3</sub>  | -12.56                      | -13.80 | -9.17  |
| Si <sub>3</sub> N <sub>3</sub> H <sub>3</sub>  | -4.38                       | -4.32  | -1.64  |
| Si <sub>3</sub> P <sub>3</sub> H <sub>3</sub>  | -7.52                       | -7.43  | -7.42  |
| Si <sub>3</sub> As <sub>3</sub> H <sub>3</sub> | -7.23                       | -7.13  | -7.03  |
| Si <sub>3</sub> Sb <sub>3</sub> H <sub>3</sub> | -9.11                       | -8.92  | -8.06  |
| Si <sub>3</sub> Bi <sub>3</sub> H <sub>3</sub> | -9.38                       | -8.92  | -1.15  |
| Ge <sub>3</sub> N <sub>3</sub> H <sub>3</sub>  | -0.86                       | -0.60  | -0.58  |
| Ge <sub>3</sub> P <sub>3</sub> H <sub>3</sub>  | -7.40                       | -7.22  | -7.18  |
| Ge <sub>3</sub> As <sub>3</sub> H <sub>3</sub> | -6.80                       | -6.55  | -6.40  |
| Ge <sub>3</sub> Sb <sub>3</sub> H <sub>3</sub> | -7.75                       | -7.30  | -6.16  |
| Ge <sub>3</sub> Bi <sub>3</sub> H <sub>3</sub> | -8.36                       | -6.99  | 2.59   |
| Sn <sub>3</sub> N <sub>3</sub> H <sub>3</sub>  | 3.92                        | 4.84   | 4.87   |
| Sn <sub>3</sub> P <sub>3</sub> H <sub>3</sub>  | -1.54                       | -1.22  | -1.13  |
| Sn <sub>3</sub> As <sub>3</sub> H <sub>3</sub> | -1.78                       | -1.45  | -1.28  |
| Sn <sub>3</sub> Sb <sub>3</sub> H <sub>3</sub> | -3.16                       | -2.55  | -1.47  |
| Sn <sub>3</sub> Bi <sub>3</sub> H <sub>3</sub> | -4.25                       | -2.51  | 6.26   |
| Pb <sub>3</sub> N <sub>3</sub> H <sub>3</sub>  | 6.09                        | 10.50  | 10.33  |
| Pb <sub>3</sub> P <sub>3</sub> H <sub>3</sub>  | 0.60                        | 2.60   | 2.81   |
| Pb <sub>3</sub> As <sub>3</sub> H <sub>3</sub> | 0.45                        | 2.26   | 2.48   |
| Pb <sub>3</sub> Sb <sub>3</sub> H <sub>3</sub> | -0.62                       | 1.52   | 2.82   |
| Pb <sub>3</sub> Bi <sub>3</sub> H <sub>3</sub> | -1.34                       | 1.69   | 10.25  |

**Table S4.** Diatropic (Dia) and paratropic (Para) contributions of the ring current for all pnictogen benzene analogues using BP86 with a relativistic triple- $\zeta$  quality basis set augmented with diffuse functions. Relativistic effects are treated with the four-component Dirac equation through scalar and spin-orbit effects.

| System                                         | NR   |       | SR   |       | SO   |       |
|------------------------------------------------|------|-------|------|-------|------|-------|
|                                                | Dia  | Para  | Dia  | Para  | Dia  | Para  |
| C <sub>6</sub> H <sub>6</sub>                  | 16.7 | -4.9  | 16.7 | -4.9  | 16.7 | -4.9  |
| C <sub>3</sub> N <sub>3</sub> H <sub>3</sub>   | 14.8 | -5.3  | 14.8 | -5.3  | 14.8 | -5.3  |
| C <sub>3</sub> P <sub>3</sub> H <sub>3</sub>   | 15.3 | -4.5  | 15.2 | -4.5  | 15.3 | -4.5  |
| C <sub>3</sub> As <sub>3</sub> H <sub>3</sub>  | 65.4 | -54.3 | 65.4 | -54.3 | 65.7 | -54.5 |
| C <sub>3</sub> Sb <sub>3</sub> H <sub>3</sub>  | 15.4 | -4.5  | 15.5 | -4.5  | 15.6 | -4.8  |
| C <sub>3</sub> Bi <sub>3</sub> H <sub>3</sub>  | 14.8 | -4.4  | 15.5 | -4.2  | 14.0 | -5.7  |
| Si <sub>3</sub> N <sub>3</sub> H <sub>3</sub>  | 6.2  | -3.9  | 6.2  | -3.9  | 6.2  | -3.9  |
| Si <sub>3</sub> P <sub>3</sub> H <sub>3</sub>  | 10.7 | -4.3  | 10.6 | -4.3  | 10.6 | -4.3  |
| Si <sub>3</sub> As <sub>3</sub> H <sub>3</sub> | 11.7 | -4.4  | 11.6 | -4.3  | 11.7 | -4.5  |
| Si <sub>3</sub> Sb <sub>3</sub> H <sub>3</sub> | 13.7 | -4.4  | 13.6 | -4.2  | 13.8 | -4.8  |
| Si <sub>3</sub> Bi <sub>3</sub> H <sub>3</sub> | 14.2 | -4.3  | 14.0 | -4.2  | 11.8 | -6.5  |
| Ge <sub>3</sub> N <sub>3</sub> H <sub>3</sub>  | 8.1  | -5.5  | 8.1  | -5.6  | 8.1  | -5.6  |
| Ge <sub>3</sub> P <sub>3</sub> H <sub>3</sub>  | 12.2 | -5.1  | 12.0 | -5.0  | 12.1 | -5.1  |
| Ge <sub>3</sub> As <sub>3</sub> H <sub>3</sub> | 12.8 | -5.0  | 12.6 | -4.9  | 12.7 | -5.1  |
| Ge <sub>3</sub> Sb <sub>3</sub> H <sub>3</sub> | 14.2 | -4.8  | 13.8 | -4.7  | 13.8 | -5.3  |
| Ge <sub>3</sub> Bi <sub>3</sub> H <sub>3</sub> | 14.3 | -4.8  | 13.7 | -4.6  | 10.3 | -7.0  |
| Sn <sub>3</sub> N <sub>3</sub> H <sub>3</sub>  | 8.3  | -6.2  | 8.2  | -6.5  | 8.2  | -6.6  |
| Sn <sub>3</sub> P <sub>3</sub> H <sub>3</sub>  | 12.1 | -5.9  | 11.8 | -5.9  | 11.8 | -5.9  |
| Sn <sub>3</sub> As <sub>3</sub> H <sub>3</sub> | 12.7 | -5.8  | 12.2 | -5.7  | 12.3 | -5.8  |
| Sn <sub>3</sub> Sb <sub>3</sub> H <sub>3</sub> | 14.0 | -5.6  | 13.3 | -5.4  | 13.2 | -5.8  |
| Sn <sub>3</sub> Bi <sub>3</sub> H <sub>3</sub> | 15.1 | -5.2  | 13.2 | -5.3  | 9.3  | -6.7  |
| Pb <sub>3</sub> N <sub>3</sub> H <sub>3</sub>  | 8.5  | -6.8  | 7.4  | -7.6  | 7.8  | -7.9  |
| Pb <sub>3</sub> P <sub>3</sub> H <sub>3</sub>  | 12.7 | -6.5  | 11.3 | -6.3  | 11.3 | -6.5  |
| Pb <sub>3</sub> As <sub>3</sub> H <sub>3</sub> | 13.2 | -6.4  | 11.5 | -6.0  | 11.6 | -6.2  |
| Pb <sub>3</sub> Sb <sub>3</sub> H <sub>3</sub> | 14.5 | -6.4  | 12.2 | -5.7  | 11.7 | -6.0  |
| Pb <sub>3</sub> Bi <sub>3</sub> H <sub>3</sub> | 14.3 | -6.0  | 11.6 | -5.5  | 7.0  | -6.7  |

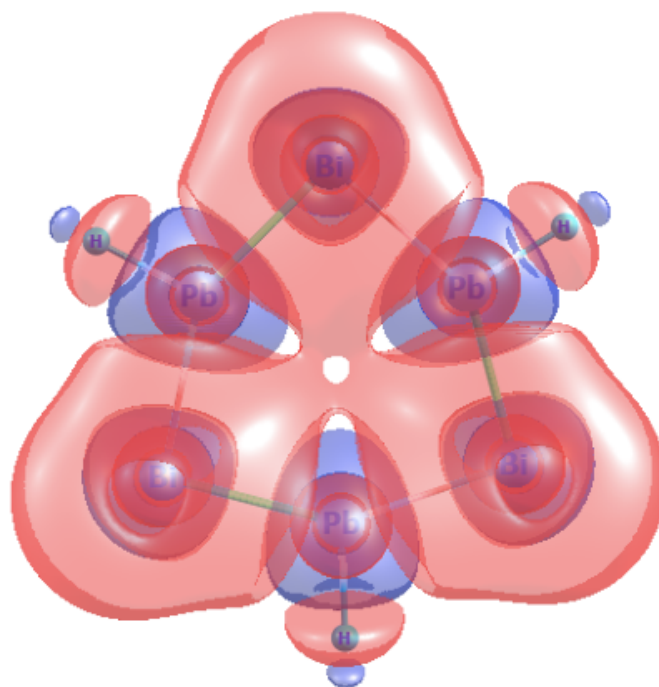

**Figure S1.** Plot of the electron-density difference between SO (relativistic) and NR (nonrelativistic) calculations of  $\text{Pb}_3\text{Bi}_3\text{H}_3$ : positive (blue) and negative (red) values, show increase and depletion in the electron density. Electron-density calculations were performed on the geometry of the neutral species. Bond lengths are almost similar in SO and NR computations.

**CARTESIAN COORDINATES AT ZORA/BP86/TZ2P LEVEL INCLUDING SPIN-ORBIT RELATIVISTIC EFFECTS**

C<sub>6</sub>H<sub>6</sub>

|   |              |              |             |
|---|--------------|--------------|-------------|
| C | -0.698507000 | 1.209850000  | 0.000000000 |
| C | 0.698507000  | 1.209850000  | 0.000000000 |
| C | 1.397014000  | 0.000000000  | 0.000000000 |
| C | 0.698507000  | -1.209850000 | 0.000000000 |
| C | -0.698507000 | -1.209850000 | 0.000000000 |
| C | -1.397014000 | 0.000000000  | 0.000000000 |
| H | -1.243715000 | 2.154177000  | 0.000000000 |
| H | 1.243715000  | 2.154177000  | 0.000000000 |
| H | 2.487429000  | 0.000000000  | 0.000000000 |
| H | 1.243715000  | -2.154177000 | 0.000000000 |
| H | -1.243715000 | -2.154177000 | 0.000000000 |
| H | -2.487429000 | 0.000000000  | 0.000000000 |

C<sub>3</sub>N<sub>3</sub>H<sub>3</sub>

|   |              |              |             |
|---|--------------|--------------|-------------|
| N | -0.689182000 | 1.193698000  | 0.000000000 |
| C | 0.648089000  | 1.122523000  | 0.000000000 |
| N | 1.378364000  | 0.000000000  | 0.000000000 |
| C | 0.648089000  | -1.122523000 | 0.000000000 |
| N | -0.689182000 | -1.193698000 | 0.000000000 |
| C | -1.296178000 | 0.000000000  | 0.000000000 |
| H | 1.194342000  | 2.068661000  | 0.000000000 |
| H | 1.194342000  | -2.068661000 | 0.000000000 |
| H | -2.388684000 | 0.000000000  | 0.000000000 |

C<sub>3</sub>P<sub>3</sub>H<sub>3</sub>

|   |              |              |             |
|---|--------------|--------------|-------------|
| P | -0.925065000 | 1.602259000  | 0.000000000 |
| C | 0.797146000  | 1.380697000  | 0.000000000 |
| P | 1.850129000  | 0.000000000  | 0.000000000 |
| C | 0.797146000  | -1.380697000 | 0.000000000 |

|   |              |              |             |
|---|--------------|--------------|-------------|
| P | -0.925065000 | -1.602259000 | 0.000000000 |
| C | -1.594292000 | 0.000000000  | 0.000000000 |
| H | 1.345380000  | 2.330267000  | 0.000000000 |
| H | 1.345380000  | -2.330267000 | 0.000000000 |
| H | -2.690760000 | 0.000000000  | 0.000000000 |

C<sub>3</sub>As<sub>3</sub>H<sub>3</sub>

|    |              |              |             |
|----|--------------|--------------|-------------|
| As | -0.994881000 | 1.723184000  | 0.000000000 |
| C  | 0.847949000  | 1.468691000  | 0.000000000 |
| As | 1.989761000  | 0.000000000  | 0.000000000 |
| C  | 0.847949000  | -1.468691000 | 0.000000000 |
| As | -0.994881000 | -1.723184000 | 0.000000000 |
| C  | -1.695899000 | 0.000000000  | 0.000000000 |
| H  | 1.396379000  | 2.418600000  | 0.000000000 |
| H  | 1.396379000  | -2.418600000 | 0.000000000 |
| H  | -2.792759000 | 0.000000000  | 0.000000000 |

C<sub>3</sub>Sb<sub>3</sub>H<sub>3</sub>

|    |              |              |             |
|----|--------------|--------------|-------------|
| Sb | -1.105459000 | 1.914710000  | 0.000000000 |
| C  | 0.931114000  | 1.612737000  | 0.000000000 |
| Sb | 2.210917000  | 0.000000000  | 0.000000000 |
| C  | 0.931114000  | -1.612737000 | 0.000000000 |
| Sb | -1.105459000 | -1.914710000 | 0.000000000 |
| C  | -1.862228000 | 0.000000000  | 0.000000000 |
| H  | 1.480147000  | 2.563690000  | 0.000000000 |
| H  | 1.480147000  | -2.563690000 | 0.000000000 |
| H  | -2.960294000 | 0.000000000  | 0.000000000 |

C<sub>3</sub>Bi<sub>3</sub>H<sub>3</sub>

|    |              |              |             |
|----|--------------|--------------|-------------|
| Bi | -1.159564000 | 2.008424000  | 0.000000000 |
| C  | 0.967931000  | 1.676505000  | 0.000000000 |
| Bi | 2.319128000  | 0.000000000  | 0.000000000 |
| C  | 0.967931000  | -1.676505000 | 0.000000000 |



|    |              |              |             |
|----|--------------|--------------|-------------|
| Bi | -1.159564000 | -2.008424000 | 0.000000000 |
| C  | -1.935861000 | 0.000000000  | 0.000000000 |
| H  | 1.517994000  | 2.629243000  | 0.000000000 |
| H  | 1.517994000  | -2.629243000 | 0.000000000 |
| H  | -3.035988000 | 0.000000000  | 0.000000000 |

Si<sub>3</sub>N<sub>3</sub>H<sub>3</sub>

|    |              |              |             |
|----|--------------|--------------|-------------|
| N  | -0.856794000 | 1.484010000  | 0.000000000 |
| Si | 0.803866000  | 1.392337000  | 0.000000000 |
| N  | 1.713587000  | 0.000000000  | 0.000000000 |
| Si | 0.803866000  | -1.392337000 | 0.000000000 |
| N  | -0.856794000 | -1.484010000 | 0.000000000 |
| Si | -1.607733000 | 0.000000000  | 0.000000000 |
| H  | -3.087673000 | 0.000000000  | 0.000000000 |
| H  | 1.543837000  | -2.674003000 | 0.000000000 |
| H  | 1.543837000  | 2.674003000  | 0.000000000 |

Si<sub>3</sub>P<sub>3</sub>H<sub>3</sub>

|    |              |              |             |
|----|--------------|--------------|-------------|
| P  | 1.167260000  | 2.021763000  | 0.000000000 |
| Si | -0.950168000 | 1.645703000  | 0.000000000 |
| P  | -2.334564000 | 0.000000000  | 0.000000000 |
| Si | -0.950168000 | -1.645703000 | 0.000000000 |
| P  | 1.167260000  | -2.021763000 | 0.000000000 |
| Si | 1.900350000  | 0.000000000  | 0.000000000 |
| H  | 3.393299000  | 0.000000000  | 0.000000000 |
| H  | -1.696634000 | -2.938643000 | 0.000000000 |
| H  | -1.696634000 | 2.938643000  | 0.000000000 |

Si<sub>3</sub>As<sub>3</sub>H<sub>3</sub>

|    |              |              |             |
|----|--------------|--------------|-------------|
| As | 1.232815000  | 2.135308000  | 0.000000000 |
| Si | -0.987017000 | 1.709518000  | 0.000000000 |
| As | -2.465694000 | 0.000000000  | 0.000000000 |
| Si | -0.987017000 | -1.709518000 | 0.000000000 |

|                                                |              |              |             |
|------------------------------------------------|--------------|--------------|-------------|
| As                                             | 1.232815000  | -2.135308000 | 0.000000000 |
| Si                                             | 1.974043000  | 0.000000000  | 0.000000000 |
| H                                              | 3.472169000  | 0.000000000  | 0.000000000 |
| H                                              | -1.736057000 | -3.006948000 | 0.000000000 |
| H                                              | -1.736057000 | 3.006948000  | 0.000000000 |
| Si <sub>3</sub> Sb <sub>3</sub> H <sub>3</sub> |              |              |             |
| Sb                                             | -1.353209000 | 2.343826000  | 0.000000000 |
| Si                                             | 1.075722000  | 1.863205000  | 0.000000000 |
| Sb                                             | 2.706417000  | 0.000000000  | 0.000000000 |
| Si                                             | 1.075722000  | -1.863205000 | 0.000000000 |
| Sb                                             | -1.353209000 | -2.343826000 | 0.000000000 |
| Si                                             | -2.151444000 | 0.000000000  | 0.000000000 |
| H                                              | -3.653171000 | 0.000000000  | 0.000000000 |
| H                                              | 1.826586000  | -3.163739000 | 0.000000000 |
| H                                              | 1.826586000  | 3.163739000  | 0.000000000 |
| Si <sub>3</sub> Bi <sub>3</sub> H <sub>3</sub> |              |              |             |
| Bi                                             | -1.411352000 | 2.444533000  | 0.000000000 |
| Si                                             | 1.107853000  | 1.918857000  | 0.000000000 |
| Bi                                             | 2.822703000  | 0.000000000  | 0.000000000 |
| Si                                             | 1.107853000  | -1.918857000 | 0.000000000 |
| Bi                                             | -1.411352000 | -2.444533000 | 0.000000000 |
| Si                                             | -2.215706000 | 0.000000000  | 0.000000000 |
| H                                              | -3.724502000 | 0.000000000  | 0.000000000 |
| H                                              | 1.862251000  | -3.225513000 | 0.000000000 |
| H                                              | 1.862251000  | 3.225513000  | 0.000000000 |
| Ge <sub>3</sub> N <sub>3</sub> H <sub>3</sub>  |              |              |             |
| N                                              | -0.932904000 | 1.615837000  | 0.000000000 |
| Ge                                             | 0.850422000  | 1.472974000  | 0.000000000 |
| N                                              | 1.865807000  | 0.000000000  | 0.000000000 |
| Ge                                             | 0.850422000  | -1.472974000 | 0.000000000 |

|    |              |              |             |
|----|--------------|--------------|-------------|
| N  | -0.932904000 | -1.615837000 | 0.000000000 |
| Ge | -1.700844000 | 0.000000000  | 0.000000000 |
| H  | -3.231766000 | 0.000000000  | 0.000000000 |
| H  | 1.615883000  | -2.798792000 | 0.000000000 |
| H  | 1.615883000  | 2.798792000  | 0.000000000 |

Ge<sub>3</sub>P<sub>3</sub>H<sub>3</sub>

|    |              |              |             |
|----|--------------|--------------|-------------|
| P  | -1.206349000 | 2.089457000  | 0.000000000 |
| Ge | 0.981096000  | 1.699308000  | 0.000000000 |
| P  | 2.412697000  | 0.000000000  | 0.000000000 |
| Ge | 0.981096000  | -1.699308000 | 0.000000000 |
| P  | -1.206349000 | -2.089457000 | 0.000000000 |
| Ge | -1.962192000 | 0.000000000  | 0.000000000 |
| H  | -3.508020000 | 0.000000000  | 0.000000000 |
| H  | 1.754010000  | -3.038035000 | 0.000000000 |
| H  | 1.754010000  | 3.038035000  | 0.000000000 |

Ge<sub>3</sub>As<sub>3</sub>H<sub>3</sub>

|    |              |              |             |
|----|--------------|--------------|-------------|
| As | -1.267852000 | 2.195985000  | 0.000000000 |
| Ge | 1.016786000  | 1.761124000  | 0.000000000 |
| As | 2.535705000  | 0.000000000  | 0.000000000 |
| Ge | 1.016786000  | -1.761124000 | 0.000000000 |
| As | -1.267852000 | -2.195985000 | 0.000000000 |
| Ge | -2.033571000 | 0.000000000  | 0.000000000 |
| H  | -3.585990000 | 0.000000000  | 0.000000000 |
| H  | 1.792995000  | -3.105559000 | 0.000000000 |
| H  | 1.792995000  | 3.105559000  | 0.000000000 |

Ge<sub>3</sub>Sb<sub>3</sub>H<sub>3</sub>

|    |              |              |             |
|----|--------------|--------------|-------------|
| Sb | -1.383819000 | 2.396845000  | 0.000000000 |
| Ge | 1.096204000  | 1.898681000  | 0.000000000 |
| Sb | 2.767638000  | 0.000000000  | 0.000000000 |
| Ge | 1.096204000  | -1.898681000 | 0.000000000 |

|    |              |              |             |
|----|--------------|--------------|-------------|
| Sb | -1.383819000 | -2.396845000 | 0.000000000 |
| Ge | -2.192408000 | 0.000000000  | 0.000000000 |
| H  | -3.749356000 | 0.000000000  | 0.000000000 |
| H  | 1.874678000  | -3.247038000 | 0.000000000 |
| H  | 1.874678000  | 3.247038000  | 0.000000000 |

Ge<sub>3</sub>Bi<sub>3</sub>H<sub>3</sub>

|    |              |              |             |
|----|--------------|--------------|-------------|
| Bi | -1.448427000 | 2.508749000  | 0.000000000 |
| Ge | 1.124865000  | 1.948324000  | 0.000000000 |
| Bi | 2.896854000  | 0.000000000  | 0.000000000 |
| Ge | 1.124865000  | -1.948324000 | 0.000000000 |
| Bi | -1.448427000 | -2.508749000 | 0.000000000 |
| Ge | -2.249731000 | 0.000000000  | 0.000000000 |
| H  | -3.818139000 | 0.000000000  | 0.000000000 |
| H  | 1.909069000  | -3.306605000 | 0.000000000 |
| H  | 1.909069000  | 3.306605000  | 0.000000000 |

Sn<sub>3</sub>N<sub>3</sub>H<sub>3</sub>

|    |              |              |             |
|----|--------------|--------------|-------------|
| N  | -1.048684000 | 1.816374000  | 0.000000000 |
| Sn | 0.949489000  | 1.644563000  | 0.000000000 |
| N  | 2.097368000  | 0.000000000  | 0.000000000 |
| Sn | 0.949489000  | -1.644563000 | 0.000000000 |
| N  | -1.048684000 | -1.816374000 | 0.000000000 |
| Sn | -1.898978000 | 0.000000000  | 0.000000000 |
| H  | -3.622229000 | 0.000000000  | 0.000000000 |
| H  | 1.811114000  | -3.136942000 | 0.000000000 |
| H  | 1.811114000  | 3.136942000  | 0.000000000 |

Sn<sub>3</sub>P<sub>3</sub>H<sub>3</sub>

|    |              |              |             |
|----|--------------|--------------|-------------|
| P  | -1.317055000 | 2.281207000  | 0.000000000 |
| Sn | 1.064114000  | 1.843100000  | 0.000000000 |
| P  | 2.634111000  | 0.000000000  | 0.000000000 |
| Sn | 1.064114000  | -1.843100000 | 0.000000000 |

|    |              |              |             |
|----|--------------|--------------|-------------|
| P  | -1.317055000 | -2.281207000 | 0.000000000 |
| Sn | -2.128228000 | 0.000000000  | 0.000000000 |
| H  | -3.862959000 | 0.000000000  | 0.000000000 |
| H  | 1.931480000  | -3.345421000 | 0.000000000 |
| H  | 1.931480000  | 3.345421000  | 0.000000000 |

Sn<sub>3</sub>As<sub>3</sub>H<sub>3</sub>

|    |              |              |             |
|----|--------------|--------------|-------------|
| As | -1.376134000 | 2.383534000  | 0.000000000 |
| Sn | 1.096082000  | 1.898470000  | 0.000000000 |
| As | 2.752268000  | 0.000000000  | 0.000000000 |
| Sn | 1.096082000  | -1.898470000 | 0.000000000 |
| As | -1.376134000 | -2.383534000 | 0.000000000 |
| Sn | -2.192164000 | 0.000000000  | 0.000000000 |
| H  | -3.933192000 | 0.000000000  | 0.000000000 |
| H  | 1.966596000  | -3.406244000 | 0.000000000 |
| H  | 1.966596000  | 3.406244000  | 0.000000000 |

Sn<sub>3</sub>Sb<sub>3</sub>H<sub>3</sub>

|    |              |              |             |
|----|--------------|--------------|-------------|
| Sb | -1.489456000 | 2.579813000  | 0.000000000 |
| Sn | 1.169052000  | 2.024858000  | 0.000000000 |
| Sb | 2.978911000  | 0.000000000  | 0.000000000 |
| Sn | 1.169052000  | -2.024858000 | 0.000000000 |
| Sb | -1.489456000 | -2.579813000 | 0.000000000 |
| Sn | -2.338104000 | 0.000000000  | 0.000000000 |
| H  | -4.082147000 | 0.000000000  | 0.000000000 |
| H  | 2.041073000  | -3.535243000 | 0.000000000 |
| H  | 2.041073000  | 3.535243000  | 0.000000000 |

Sn<sub>3</sub>Bi<sub>3</sub>H<sub>3</sub>

|    |              |              |             |
|----|--------------|--------------|-------------|
| Bi | -1.558208000 | 2.698896000  | 0.000000000 |
| Sn | 1.196730000  | 2.072796000  | 0.000000000 |
| Bi | 3.116417000  | 0.000000000  | 0.000000000 |
| Sn | 1.196730000  | -2.072796000 | 0.000000000 |

|    |              |              |             |
|----|--------------|--------------|-------------|
| Bi | -1.558208000 | -2.698896000 | 0.000000000 |
| Sn | -2.393459000 | 0.000000000  | 0.000000000 |
| H  | -4.150665000 | 0.000000000  | 0.000000000 |
| H  | 2.075332000  | -3.594581000 | 0.000000000 |
| H  | 2.075332000  | 3.594581000  | 0.000000000 |

Pb<sub>3</sub>N<sub>3</sub>H<sub>3</sub>

|    |              |              |             |
|----|--------------|--------------|-------------|
| N  | -1.109952000 | 1.922493000  | 0.000000000 |
| Pb | 0.989649000  | 1.714122000  | 0.000000000 |
| N  | 2.219903000  | 0.000000000  | 0.000000000 |
| Pb | 0.989649000  | -1.714122000 | 0.000000000 |
| N  | -1.109952000 | -1.922493000 | 0.000000000 |
| Pb | -1.979298000 | 0.000000000  | 0.000000000 |
| H  | -3.762768000 | 0.000000000  | 0.000000000 |
| H  | 1.881384000  | -3.258652000 | 0.000000000 |
| H  | 1.881384000  | 3.258652000  | 0.000000000 |

Pb<sub>3</sub>P<sub>3</sub>H<sub>3</sub>

|    |              |              |             |
|----|--------------|--------------|-------------|
| P  | -1.359237000 | 2.354268000  | 0.000000000 |
| Pb | 1.095459000  | 1.897391000  | 0.000000000 |
| P  | 2.718474000  | 0.000000000  | 0.000000000 |
| Pb | 1.095459000  | -1.897391000 | 0.000000000 |
| P  | -1.359237000 | -2.354268000 | 0.000000000 |
| Pb | -2.190918000 | 0.000000000  | 0.000000000 |
| H  | -3.986831000 | 0.000000000  | 0.000000000 |
| H  | 1.993415000  | -3.452697000 | 0.000000000 |
| H  | 1.993415000  | 3.452697000  | 0.000000000 |

Pb<sub>3</sub>As<sub>3</sub>H<sub>3</sub>

|    |              |              |             |
|----|--------------|--------------|-------------|
| As | -1.415929000 | 2.452460000  | 0.000000000 |
| Pb | 1.126818000  | 1.951706000  | 0.000000000 |
| As | 2.831857000  | 0.000000000  | 0.000000000 |
| Pb | 1.126818000  | -1.951706000 | 0.000000000 |

|    |              |              |             |
|----|--------------|--------------|-------------|
| As | -1.415929000 | -2.452460000 | 0.000000000 |
| Pb | -2.253636000 | 0.000000000  | 0.000000000 |
| H  | -4.057446000 | 0.000000000  | 0.000000000 |
| H  | 2.028723000  | -3.513852000 | 0.000000000 |
| H  | 2.028723000  | 3.513852000  | 0.000000000 |

Pb<sub>3</sub>Sb<sub>3</sub>H<sub>3</sub>

|    |              |              |             |
|----|--------------|--------------|-------------|
| Sb | -1.529542000 | 2.649244000  | 0.000000000 |
| Pb | 1.195814000  | 2.071210000  | 0.000000000 |
| Sb | 3.059083000  | 0.000000000  | 0.000000000 |
| Pb | 1.195814000  | -2.071210000 | 0.000000000 |
| Sb | -1.529542000 | -2.649244000 | 0.000000000 |
| Pb | -2.391627000 | 0.000000000  | 0.000000000 |
| H  | -4.199686000 | 0.000000000  | 0.000000000 |
| H  | 2.099843000  | -3.637035000 | 0.000000000 |
| H  | 2.099843000  | 3.637035000  | 0.000000000 |

Pb<sub>3</sub>Bi<sub>3</sub>H<sub>3</sub>

|    |              |              |             |
|----|--------------|--------------|-------------|
| Bi | -1.614096000 | 2.795696000  | 0.000000000 |
| Pb | 1.227098000  | 2.125396000  | 0.000000000 |
| Bi | 3.228192000  | 0.000000000  | 0.000000000 |
| Pb | 1.227098000  | -2.125396000 | 0.000000000 |
| Bi | -1.614096000 | -2.795696000 | 0.000000000 |
| Pb | -2.454196000 | 0.000000000  | 0.000000000 |
| H  | -4.284485000 | 0.000000000  | 0.000000000 |
| H  | 2.142242000  | -3.710473000 | 0.000000000 |
| H  | 2.142242000  | 3.710473000  | 0.000000000 |
